# Supplementary material
Source: MDPI journal article supplement (https://www.mdpi.com/2075-163X/14/3/253)
Supplement: s1 [file s1]

**Table S1.** List of Analytical Method Quality Parameters.

| Item  | Elements | Method, Instrument Model      | Detection Limit           |
|-------|----------|-------------------------------|---------------------------|
| Soil  | pH       | pH                            | -                         |
|       | As       | AFS                           | 0.01 mg•kg <sup>-1</sup>  |
|       | Hg       |                               | 0.002 mg•kg <sup>-1</sup> |
|       | Cr       | AAS                           | 2 mg•kg <sup>-1</sup>     |
|       | Cd       |                               | 0.01 mg•kg <sup>-1</sup>  |
|       | Cu       | ICP-MS                        | 1.2 mg•kg <sup>-1</sup>   |
|       | Ni       |                               | 1.9 mg•kg <sup>-1</sup>   |
|       | Pb       |                               | 2.1 mg•kg <sup>-1</sup>   |
| Water | pH       | pH, PHS-3E                    | -                         |
|       | As       | AFS, XGY-1011A                | 0.3 µg•L <sup>-1</sup>    |
|       | Cd       | ICP-MS, ICAP RQ               | 0.05 µg•L <sup>-1</sup>   |
|       | Cr       | Visible spectrophotometer, T6 | 0.004 mg•L <sup>-1</sup>  |
|       | Cu       |                               | 0.08 µg•L <sup>-1</sup>   |
|       | Pb       | ICP-MS, ICAP RQ               | 0.09 µg•L <sup>-1</sup>   |
|       | Hg       | AFS, XGY-1011A                | 0.04 µg•L <sup>-1</sup>   |
|       | Ni       | ICP-MS, ICAP RQ               | 0.06 µg•L <sup>-1</sup>   |

The calculations for the single-factor pollution index and the Nemerow pollution index are shown in Formula (1) and (2), respectively.

$$P_i = C_i / S_i \quad (1)$$

where  $P_i$  is the pollution index of a single heavy metal(loid)  $i$ ;  $C_i$  is the concentration of heavy metal(loid)s (mg•kg<sup>-1</sup>); and  $S_i$  is the evaluation standard of heavy metal(loid)s (mg•kg<sup>-1</sup>) in soil. In this study, GB 36600–2018 was adopted as the evaluation standard, and specified risk screening values are outlined in Table S2.

**Table S2.** Risk screening values for soil contamination of Construction land (mg•kg<sup>-1</sup>).

|                  | As  | Hg | Cd  | Cu    | Ni   | Pb   |
|------------------|-----|----|-----|-------|------|------|
| Screening values | 60  | 38 | 65  | 18000 | 900  | 800  |
| Control values   | 140 | 82 | 172 | 36000 | 2000 | 2500 |

$$P_N = \sqrt{\frac{P_{ave}^2 + P_{max}^2}{2}} \quad (2)$$

where  $P_N$  is the Nemerow pollution index of heavy metal(loid)s in soil;  $P_{ave}$  is the average value of the single factor index;  $P_{max}$  is the maximum value of the single factor pollution index. The classification criteria for the assessment of soil heavy metal(loid) pollution are presented in Table S3.

**Table S3.** Classification criteria for the assessment of soil heavy metal(loid) pollution assessment.

| Level | Nemerow Index        | Degree of Pollution      |
|-------|----------------------|--------------------------|
| 1     | $P_N \leq 0.7$       | Uncontaminated           |
| 2     | $0.7 < P_N \leq 1.0$ | Warning Level of Caution |
| 3     | $1.0 < P_N \leq 2.0$ | Low pollution            |
| 4     | $2.0 < P_N \leq 3.0$ | Moderate pollution       |
| 5     | $P_N > 3.0$          | High pollution           |

The average exposure dose for each pathway ( $ADD_{ing}$ ,  $ADD_{inh}$  and  $ADD_{derm}$ ) can be calculated using Formulas (3), (4) and (5).

$$ADD_{ing} = C_i \times (R_{ing} \times EF \times ED/BW \times AT) \quad (3)$$

$$ADD_{inh} = C_i \times (R_{inh} \times EF \times ED/PEF \times BW \times AT) \quad (4)$$

$$ADD_{derm} = C_i \times (SA \times SL \times ABF \times EF \times ED/BW \times AT) \quad (5)$$

where the main symbols used in the formulas are explained in Table S4.

**Table S4.** Parameter values of health risk assessment model.

| Parameter                          | Child                    | Adult                    | Reference |
|------------------------------------|--------------------------|--------------------------|-----------|
| $R_{ing}$ ( $mg \cdot d^{-1}$ )    | 200                      | 100                      | [48]      |
| $EF(d \cdot a^{-1})$               | 350                      | 350                      |           |
| $ED$ (a)                           | 6                        | 24                       |           |
| $BW(kg)$                           | 15.9                     | 56.8                     |           |
| $AT(d)$                            | 25550 (Carcinogenic)     | 25550(Carcinogenic)      |           |
|                                    | 2190 (non-carcinogenic)  | 8760 (non-carcinogenic)  |           |
| $R_{inh}(m^3 \cdot d^{-1})$        | 7.5                      | 14.5                     |           |
| $PEF(m^3 \cdot kg^{-1})$           | $1.36 \times 10^9$       | $1.36 \times 10^9$       |           |
| $SL(mg \cdot (cm^2 \cdot d)^{-1})$ | 0.2                      | 0.07                     |           |
| $SA$ ( $cm^2$ )                    | 2800                     | 5700                     |           |
| $ABF$ (zero dimension)             | 0.01 (Carcinogenic)      | 0.01 (Carcinogenic)      |           |
|                                    | 0.001 (non-carcinogenic) | 0.001 (non-carcinogenic) |           |

The non-carcinogenic risk for each heavy metal(loid) and the total index ( $HI$ ) is the sum of  $HQ$  of heavy metal(loid)s, calculated by Formulas (6) and (7), respectively.

$$HQ = ADD/RfD \quad (6)$$

$$HI = \sum HQ \quad (7)$$

where  $RfD$  represents the non-carcinogenic average daily reference dose for heavy metal(loid)s  $i$  in ( $mg \cdot (kg \cdot d)^{-1}$ ),  $k$  means different pathways of exposure.

The carcinogenic risk for each heavy metal(loid) ( $CR$ ) and the total carcinogenic risk ( $TCR$ ) can be estimated using Formulas (8) and (9), respectively.

$$CR = ADD \times SF \quad (8)$$

$$TCR = \sum CR \quad (9)$$

where  $SF$  is the carcinogenicity slope factor in ( $(kg \cdot d) \cdot mg^{-1}$ ), specific reference value in-Table S5.

**Table S5.** Reference dose (RfD) and slope factor (SF) of different exposure routes.

| HMs | RfD/(mg·(kg·d) <sup>−1</sup> ) |                         |                         | SF/((kg·d)·mg <sup>−1</sup> ) |                         |                         | Reference |
|-----|--------------------------------|-------------------------|-------------------------|-------------------------------|-------------------------|-------------------------|-----------|
|     | Oral Ingestion                 | Respiratory Inhalation  | Skin Exposure           | Oral Ingestion                | Respiratory Inhalation  | Skin Exposure           |           |
| Cu  | 4.00 × 10 <sup>−2</sup>        | 4.02 × 10 <sup>−2</sup> | 1.20 × 10 <sup>−2</sup> | -                             | -                       | -                       | [93]      |
| Ni  | 2.00 × 10 <sup>−2</sup>        | 2.06 × 10 <sup>−2</sup> | 5.40 × 10 <sup>−3</sup> | 1.70                          | 0.84                    | 42.50                   |           |
| Pb  | 3.50 × 10 <sup>−3</sup>        | 3.52 × 10 <sup>−3</sup> | 5.25 × 10 <sup>−4</sup> | 8.5 × 10 <sup>−3</sup>        | 4.2 × 10 <sup>−2</sup>  | 1.7 × 10 <sup>−2</sup>  |           |
| Cd  | 1.00 × 10 <sup>−3</sup>        | 1.00 × 10 <sup>−5</sup> | 1.00 × 10 <sup>−5</sup> | 6.10                          | 6.30                    | 6.10                    | [94]      |
| As  | 3.00 × 10 <sup>−4</sup>        | 1.23 × 10 <sup>−4</sup> | 1.23 × 10 <sup>−4</sup> | 1.50                          | 15.10                   | 3.66                    |           |
| Hg  | 3.00 × 10 <sup>−4</sup>        | 8.57 × 10 <sup>−5</sup> | 2.10 × 10 <sup>−5</sup> | 3.00 × 10 <sup>−4</sup>       | 3.00 × 10 <sup>−4</sup> | 3.00 × 10 <sup>−7</sup> |           |
